# Supplementary material for: Triphenylamine based lab-on-a-molecule for the highly selective and sensitive detection of Zn2+ and CN− in aqueous solution
Source: Royal Society of Chemistry journal article supplement (doi:10.1039/c6ra17354c), 2016-01-01
Supplement: c6ra17354c1.pdf [file c6ra17354c1.pdf]

## Supporting Information

### **Triphenylamine based Lab-on-a-molecule for the highly selective and sensitive detection of Zn<sup>2+</sup> and CN<sup>-</sup> in aqueous solution**

Shichao Sun<sup>a</sup>, Qinghai Shu<sup>a,\*</sup>, Pengchao Lin<sup>a</sup>, Yanyue Li<sup>a</sup>, Shaohua Jin<sup>a</sup>, Xin Chen<sup>b,\*</sup>, Dequan Wang<sup>c,\*</sup>

<sup>a</sup> School of Materials Science & Engineering, Beijing Institute of Technology, Beijing, China. Email: qhshu121@bit.edu.cn.

<sup>b</sup> State key Laboratory of Oncology in South China, Collaborative Innovation Center of Cancer Medicine, Sun Yat-Sen University Cancer Center, Guangzhou, China.

Email: chenxin@sysucc.org.cn.

<sup>c</sup> Institute of Theoretical Chemistry, Jilin University, Changchun, China.

Email: dequan\_wang@jlu.edu.cn.

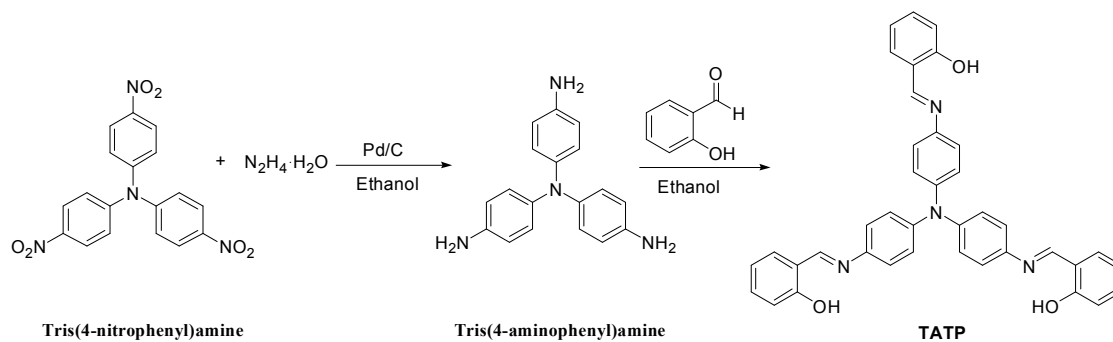

Fig. S1 The synthesis route of TATP.

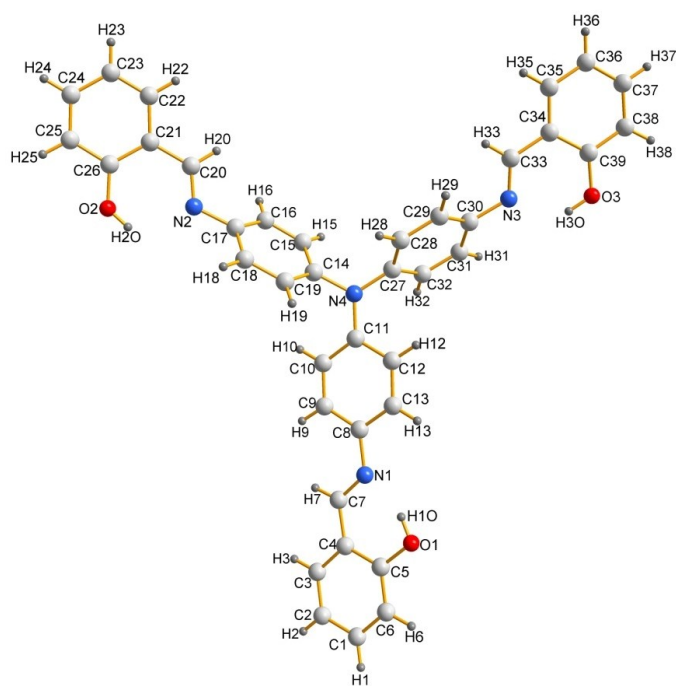

Fig. S2 Crystal structure of TATP and its unit cell. The deposit CCDC number: 1476312.

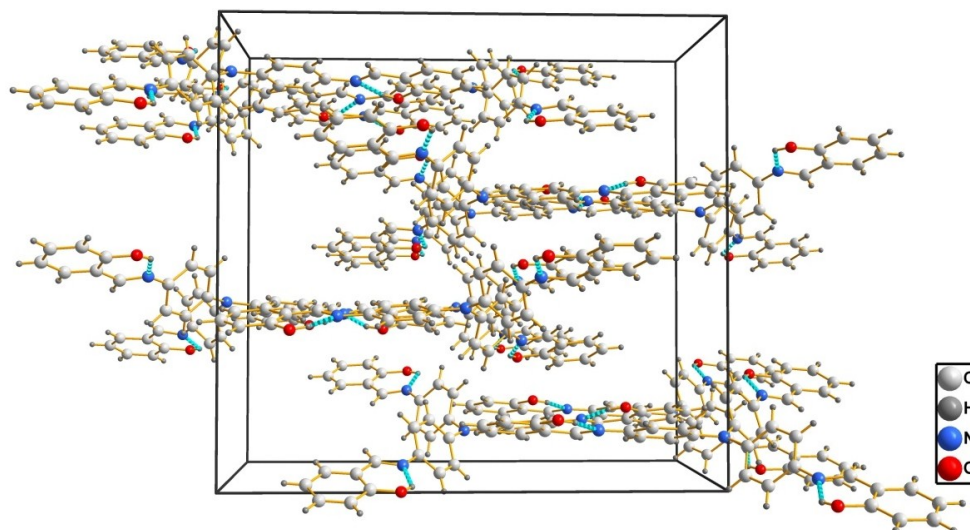

Fig. S3 Packing cell of the crystal structure of TATP.

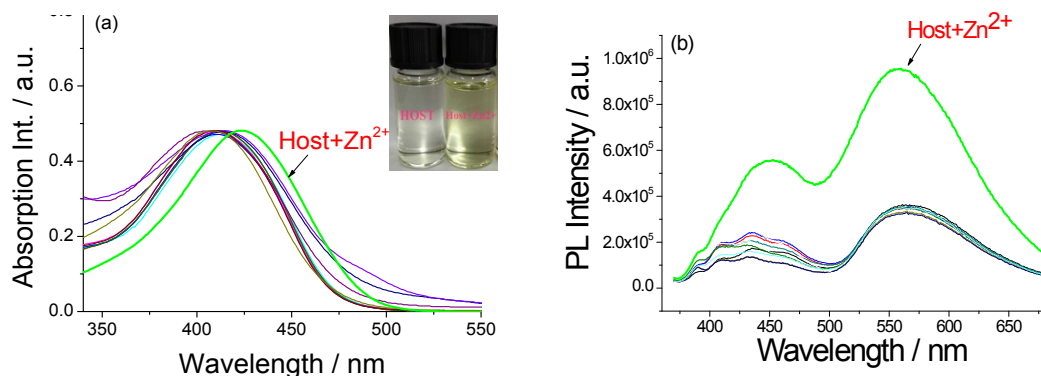

Fig. S4 (a) UV/vis spectra of TATP (10  $\mu\text{M}$ ) in 0.1 M Tris-ClO<sub>4</sub> buffer solution (pH = 7.24, DMF: buffer = 1 / 2, v / v) after addition of 50.0 equiv of various metal ions. Inset: The color changes of TATP (10  $\mu\text{M}$ ) upon addition of Zn<sup>2+</sup>; (b) Fluorescence emission spectra ( $\lambda_{\text{ex}} = 350 \text{ nm}$ ) of TATP (10  $\mu\text{M}$ ) in the presence of 50.0 equiv of various metal ions in 0.1 M Tris-ClO<sub>4</sub> buffer solution (pH = 7.24, DMF: buffer = 1 / 2, v / v).

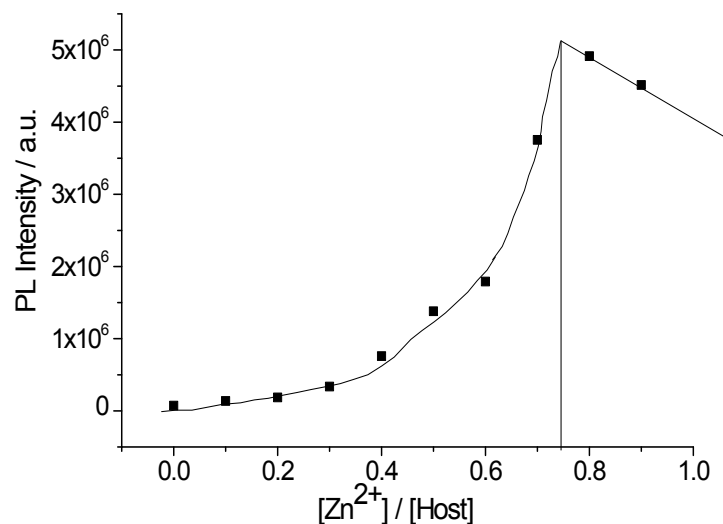

Fig. S5 Jobs plot of TATP and Zn<sup>2+</sup> in 0.1 M Tris-ClO<sub>4</sub> buffer solution (pH = 7.24, DMF: buffer = 1 / 2, v / v). The total concentration of Zn<sup>2+</sup> and TATP is  $1 \times 10^{-4} \text{ M}$ .

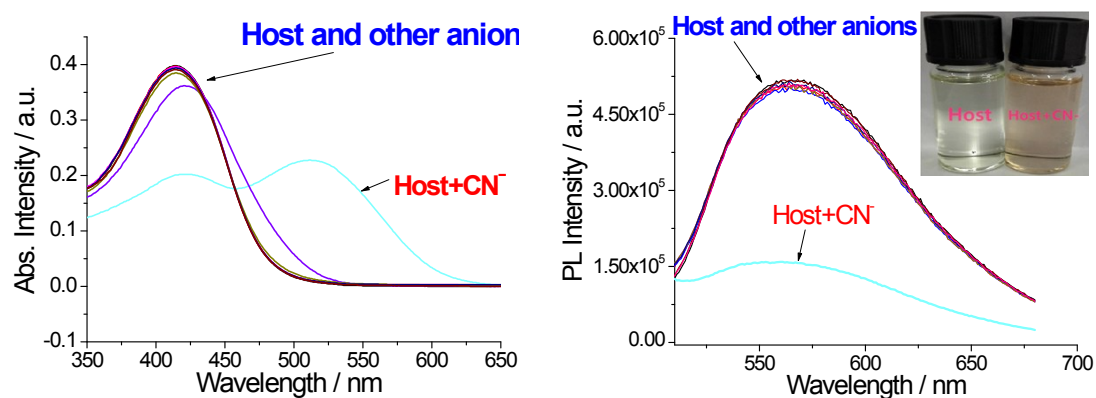

Fig. S6 UV/vis (a) and emission spectra (b,  $\lambda_{\text{ex}} = 350 \text{ nm}$ ) of TATP (10  $\mu\text{M}$ ) in the presence of 50.0 equiv of various metal ions in 0.1 M Tris-ClO<sub>4</sub> buffer solution (pH = 7.24, DMF: buffer = 1 / 2, v / v); Inset: The solution

color changes of TATP (10  $\mu$ M) upon addition of  $\text{CN}^-$ .

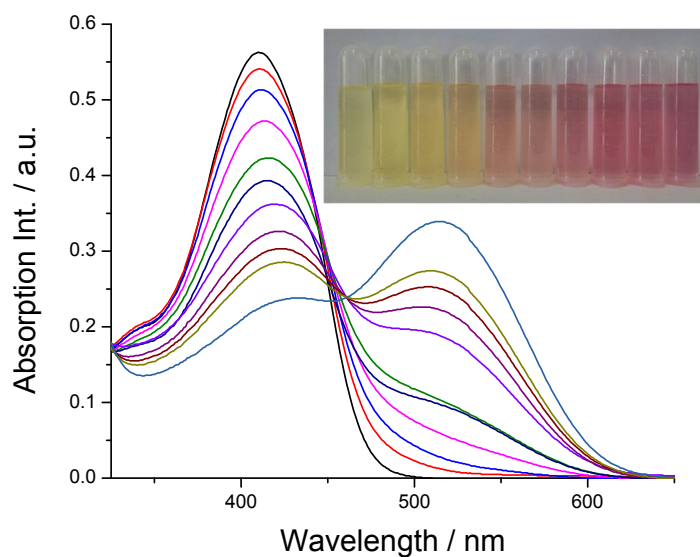

**Fig. S7** UV/vis spectra of TATP ( 10 $\mu$ M ) in 0.1 M Tris-ClO<sub>4</sub> buffer solution (pH = 7.24, DMF: buffer = 1 / 2, v / v) after addition of 0.5-50.0 equiv of  $\text{CN}^-$ .

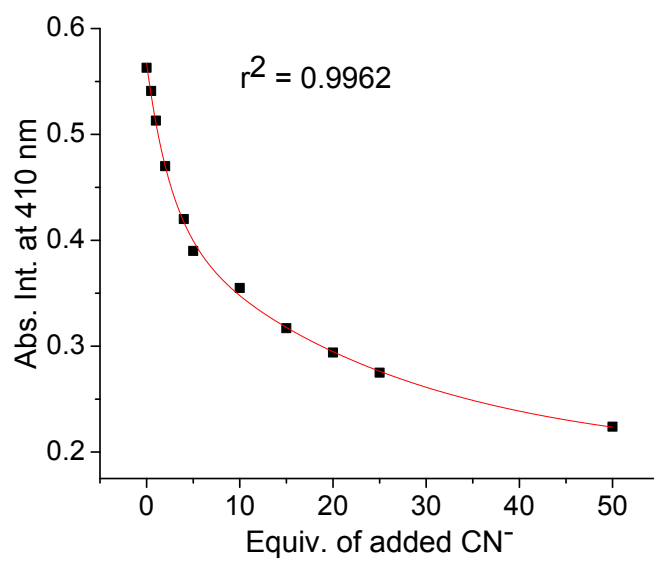

**Fig. S8** The absorption intensity of TATP at 410 nm as a function of  $\text{CN}^-$  equivalent in 0.1 M Tris-ClO<sub>4</sub> buffer solution (pH = 7.24, DMF: buffer = 1 / 2, v / v).

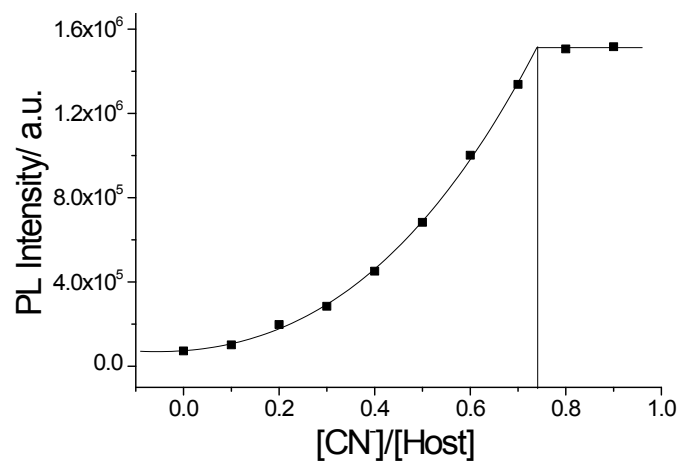

**Figure S9** Jobs plot of **TATP** and **CN<sup>-</sup>** in 0.1 M Tris-ClO<sub>4</sub> buffer solution (pH = 7.24, DMF: buffer = 1 / 2, v / v). The total concentration of **CN<sup>-</sup>** and **TATP** is 1 × 10<sup>-4</sup> M.

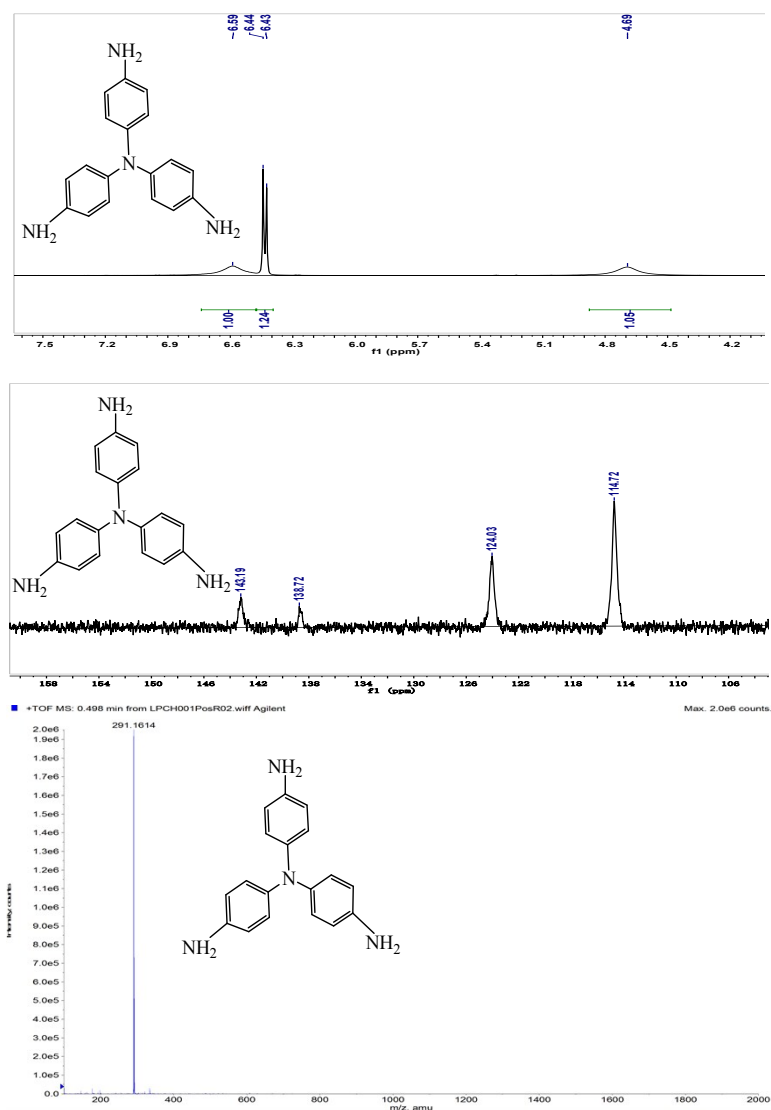

**Fig. S10** <sup>1</sup>H-NMR, <sup>13</sup>C-NMR and MS spectrogram (top to bottom) of Tris(4-aminophenyl)amine.



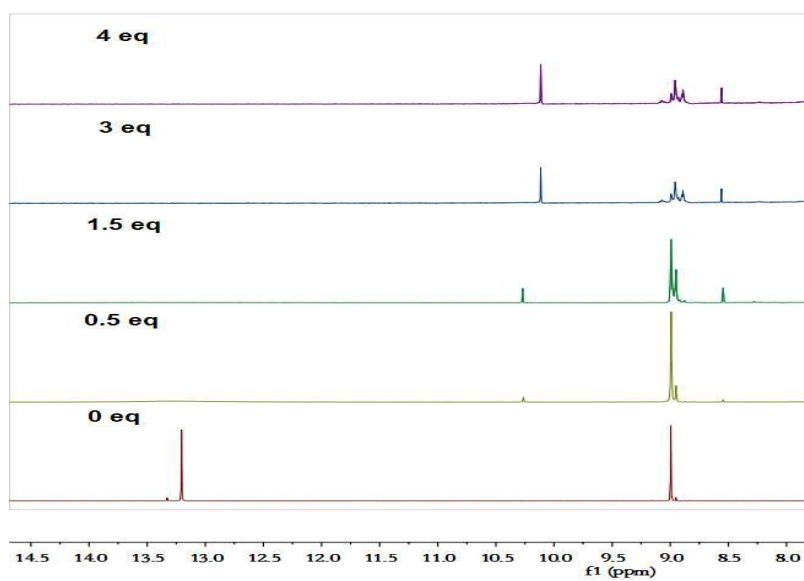

**Fig. S13** <sup>1</sup>H NMR titration of TATP by adding different equivalents of CN<sup>-</sup> into TATP solution in DMSO-d<sub>6</sub>.
